# Supplementary material for: Multiple-cation wide-bandgap perovskite solar cells grown using cesium formate as the Cs precursor with high efficiency under sunlight and indoor illumination
Source: Royal Society of Chemistry journal article supplement (doi:10.1039/d2cp02358j), 2022-01-01
Supplement: d2cp02358j1.pdf [file d2cp02358j1.pdf]

## Supporting Information

### **Multiple-cation wide-bandgap perovskite solar cells grown via using cesium formate as Cs precursor with high efficiency under sunlight and indoor illumination**

Qiang Guo<sup>a</sup>, Yuanjia Ding<sup>a,b</sup>, Zheng Dai<sup>a,b</sup>, Zongwei Chen<sup>a</sup>, Mengzhen Du<sup>a,b</sup>, Zongtao Wang<sup>a,b</sup>, Lei Gao<sup>a</sup>, Chen Duan<sup>a</sup>, Qing Guo<sup>a</sup>, Erjun Zhou<sup>b\*</sup>

<sup>a</sup> Henan Institute of Advanced Technology, Zhengzhou University, Zhengzhou 450003, China.

<sup>b</sup> CAS Key Laboratory of Nanosystem and Hierarchical Fabrication, CAS Center for Excellence in Nanoscience, National Center for Nanoscience and Technology, Beijing 100190, China.

E-mail: [zhouej@nanoctr.cn](mailto:zhouej@nanoctr.cn)

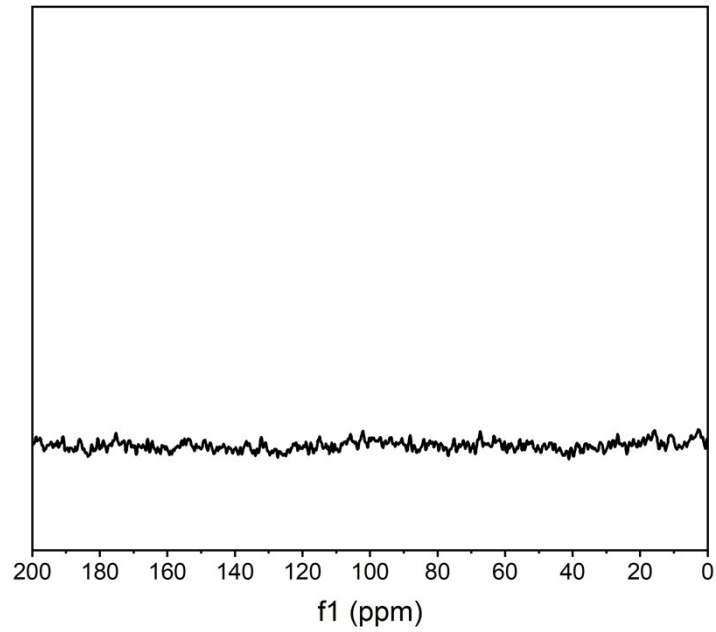

**Figure S1.**  $^{13}\text{C}$  MAS NMR spectrum of the first-step precursor film with CsFa.

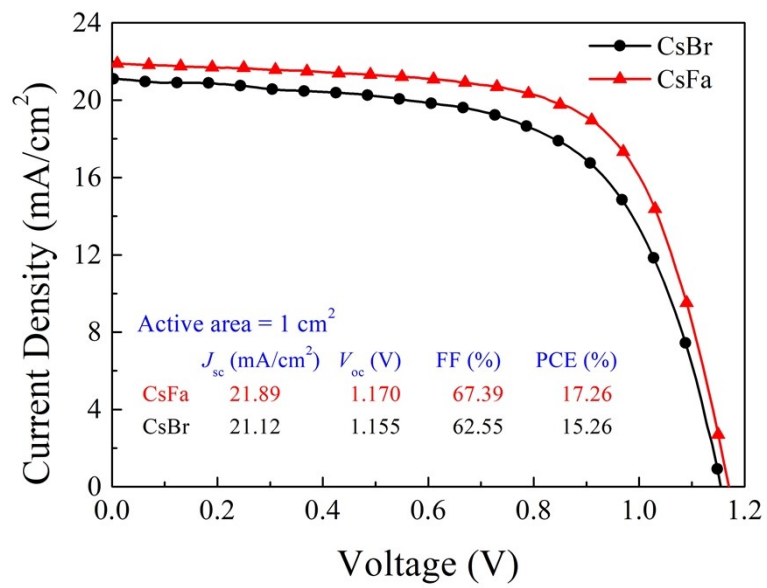

**Figure S2.**  $J$ - $V$  curves of 1.63 eV PSCs with large active area of 1 cm<sup>2</sup>.

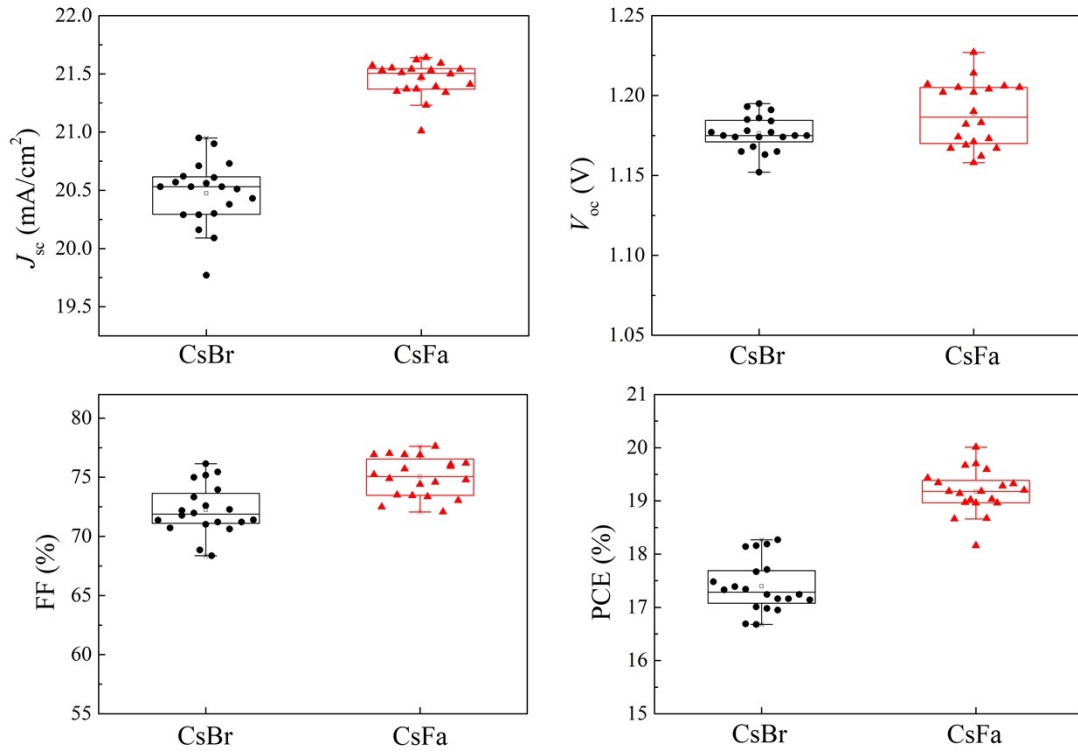

**Figure S3.** Photovoltaic parameters (reverse scan) distribution of 20 individual 1.63 eV WBG PSCs based on CsBr-perovskite and CsFa-perovskite.

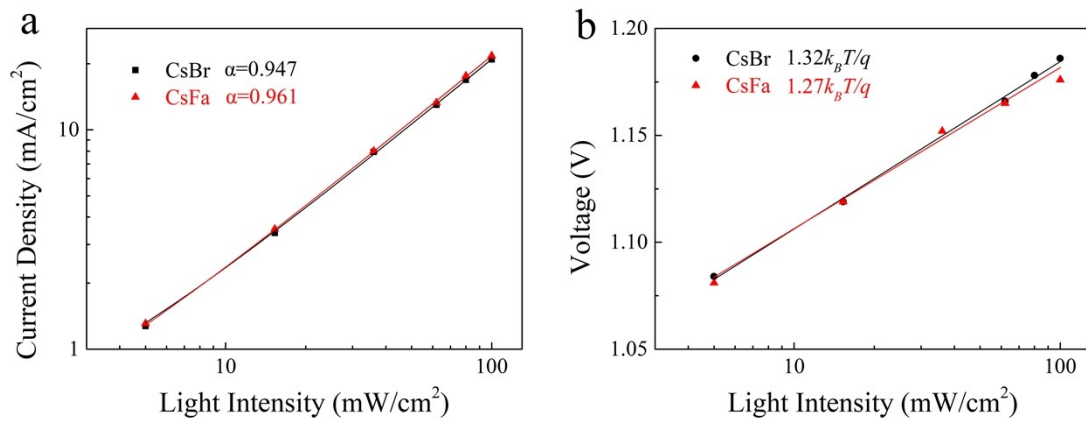

**Figure S4.** (a)  $J_{sc}$  and (b)  $V_{oc}$  versus light intensity of the 1.63 eV WBG PSCs.

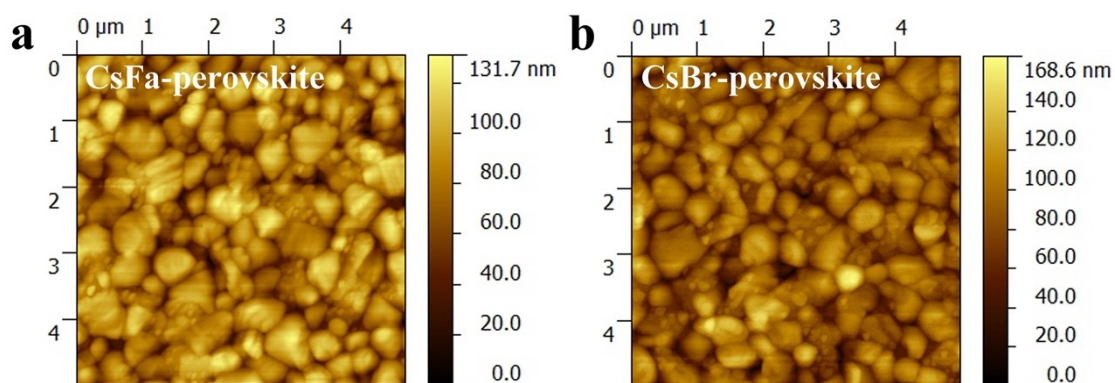

**Figure S5.** AFM topography images of **(a)** CsFa-perovskite and **(b)** CsBr-perovskite after continuous illumination under AM 1.5G sunlight for 7 hours.

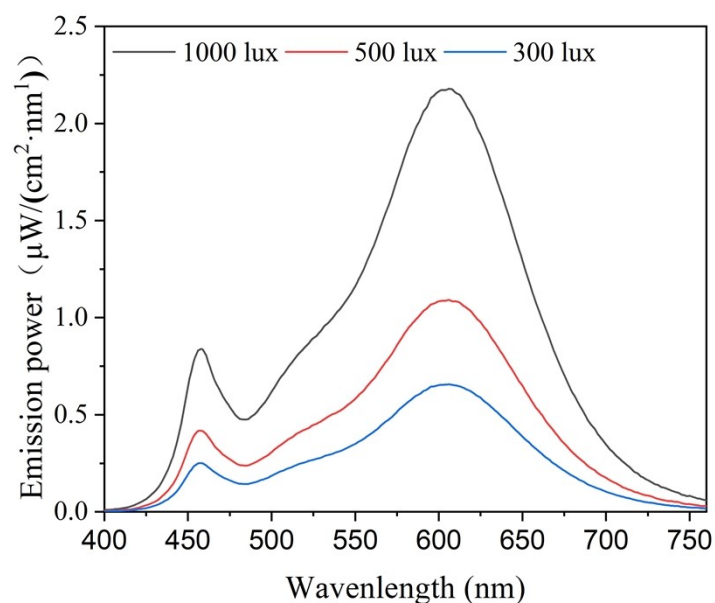

**Figure S6.** Emission power spectrum of the LED bulb.

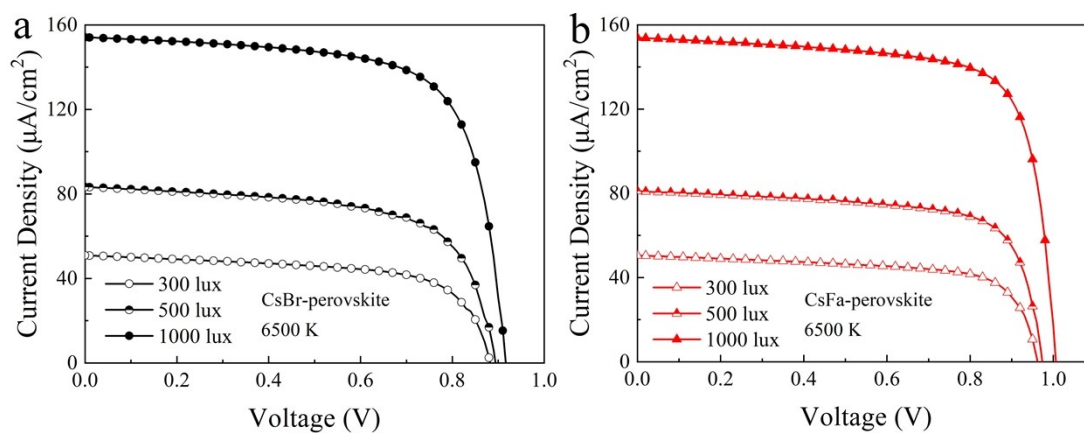

**Figure S7.**  $J$ - $V$  curves of **(a)** CsBr-perovskite and **(b)** CsFa-perovskite based 1.63 eV PSCs under a 6500K LED light illumination condition.

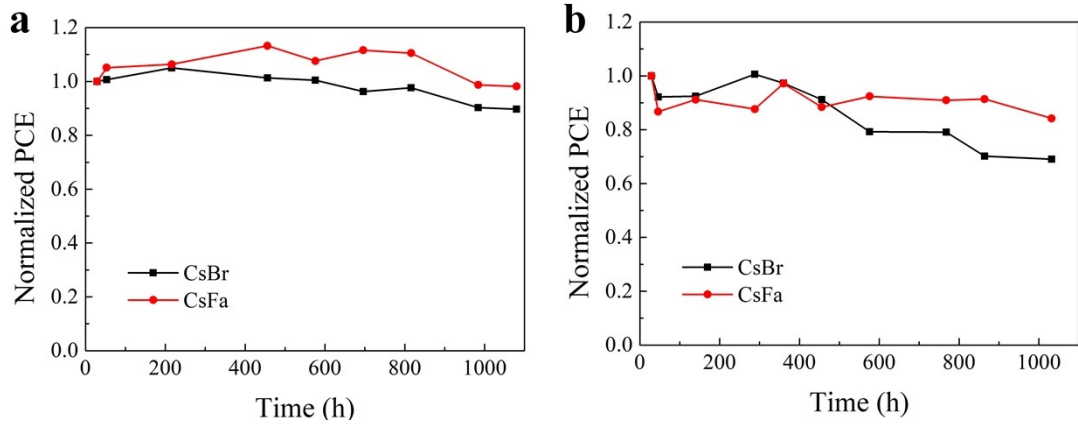

**Figure S8.** Normalized PCEs of unencapsulated 1.63 eV WBG PSCs based on CsBr-perovskite and CsFa-perovskite after aging (a) in an N<sub>2</sub>-filled glovebox for 1080 hours and (b) in an ambient environment (relative humidity < 10%) for 1032 hours.

**Table S1.** Kinetic Fit Parameters for CsBr-perovskite and CsFa-perovskite.

|      | $\lambda_{\text{probe}}$ (nm) | $\tau_1$ (ps) | $A_1$ | $\tau_2$ (ps) | $A_2$ |
|------|-------------------------------|---------------|-------|---------------|-------|
| CsBr | 742                           | 7.1±0.4       | 53.6% | 700.7±25.6    | 46.4% |
| CsBr | 750                           | 7.1±0.5       | 50.7% | 833.9±31.7    | 49.3% |
| CsFa | 742                           | 46.9±5.0      | 70.3% | 998.9±46.3    | 29.7% |

**Table S2.** Photovoltaic parameters of 1.63 eV PSCs based on CsBr-perovskite and CsFa-perovskite under 6500K LED light illumination.

|                 | Light intensity (lux) | Power density ( $\mu\text{W cm}^{-2}$ ) | $J_{\text{sc}}$ ( $\mu\text{A cm}^{-2}$ ) | $V_{\text{oc}}$ (V) | FF (%) | PCE (%) |
|-----------------|-----------------------|-----------------------------------------|-------------------------------------------|---------------------|--------|---------|
| CsBr-perovskite | 300                   | 98.00                                   | 50.89                                     | 0.883               | 65.27  | 29.93   |
|                 | 500                   | 161.42                                  | 83.34                                     | 0.894               | 64.80  | 29.91   |
|                 | 1000                  | 323.97                                  | 154.11                                    | 0.916               | 70.41  | 30.68   |
| CsFa-perovskite | 300                   | 98.00                                   | 50.48                                     | 0.962               | 68.78  | 34.08   |
|                 | 500                   | 161.42                                  | 81.08                                     | 0.974               | 70.41  | 34.45   |
|                 | 1000                  | 323.97                                  | 153.89                                    | 1.006               | 74.10  | 35.41   |

**Table S3.** Summary of photovoltaic parameters for WBG PSCs with perovskite bandgap of around ~1.63 eV.

| Bandgap of perovskite ( $E_g$ ) (eV) | $J_{sc}$ (mA/cm <sup>2</sup> ) | $V_{oc}$ (V) | FF (%)       | PCE (%)      | Reference                                               |
|--------------------------------------|--------------------------------|--------------|--------------|--------------|---------------------------------------------------------|
| 1.61                                 | 22.98                          | 1.184        | 77.34        | 21.04        | <i>Adv. Energy Mater.</i> , 2020, <b>10</b> , 2000197.  |
| 1.62                                 | 23.79                          | 1.17         | 79.05        | 22.06        | <i>Adv. Mater.</i> , 2021, <b>33</b> , 2100791.         |
| 1.63                                 | 22.8                           | 1.18         | 81           | 21.8         | <i>Science</i> , 2016, <b>354</b> , 206-209.            |
| 1.63                                 | 21.8                           | 1.14         | 74.0         | 18.4         | <i>Energy Environ. Sci.</i> , 2018, <b>11</b> , 394-406 |
| 1.63                                 | 20.8                           | 1.124        | 79.3         | 18.5         | <i>Science</i> , 2019, <b>364</b> , 475-479.            |
| 1.63                                 | 22.11                          | 1.13         | 81.35        | 20.35        | <i>Nano Energy</i> , 2021, <b>86</b> , 106114.          |
| 1.63                                 | 22.3                           | 1.12         | 77.7         | 19.4         | <i>Nat. Commun.</i> , 2020, <b>11</b> , 1257.           |
| 1.63                                 | 22.37                          | 1.24         | 77.65        | 21.54        | <i>Nat. Photon.</i> , 2021, <b>55</b> , 681-689.        |
| <b>1.63</b>                          | <b>21.58</b>                   | <b>1.204</b> | <b>77.01</b> | <b>20.01</b> | <b>This Work</b>                                        |
| 1.64                                 | 20.4                           | 1.15         | 80.4         | 19.3         | <i>Joule</i> , 2019, <b>3</b> , 177-190.                |
| 1.65                                 | 21.2                           | 1.22         | 80.5         | 20.8         | <i>Nat. Commun.</i> , 2018, <b>9</b> , 3100.            |
| 1.65                                 | 21.6                           | 1.18         | 75.3         | 19.2         | <i>Adv. Funct. Mater.</i> , 2020, <b>30</b> , 1909919.  |
| 1.65                                 | 21.69                          | 1.127        | 82           | 20.04        | <i>ACS Energy Lett.</i> , 2021, <b>6</b> , 2735-2741.   |

**Table S4.** Summary of some recently reported efficient PSCs' photovoltaic parameters under artificial indoor light.

| Perovskite                                                                                        | Artificial light  | Light intensity (lux) | Power density ( $\mu\text{W cm}^{-2}$ ) | $J_{\text{sc}}$ ( $\text{mA/cm}^2$ ) | $V_{\text{oc}}$ (V) | FF (%)       | PCE (%)      | Reference                                             |
|---------------------------------------------------------------------------------------------------|-------------------|-----------------------|-----------------------------------------|--------------------------------------|---------------------|--------------|--------------|-------------------------------------------------------|
| $\text{CH}_3\text{NH}_3\text{PbI}_3$                                                              | Fluorescent 2700K | 1000                  | 278.7                                   | 150.1                                | 0.87                | 75.2         | 35.2         | <i>Adv. Energy Mater.</i> , 2018, <b>8</b> , 1801509. |
| $\text{CH}_3\text{NH}_3\text{PbI}_{2-x}\text{BrCl}_x$                                             | Fluorescent 2700K | 1000                  | 275.4                                   | 126.2                                | 1.028               | 76.8         | 36.2         | <i>Adv. Energy Mater.</i> , 2019, <b>9</b> , 1901980. |
| $\text{CsPbI}_2\text{Br}$                                                                         | Fluorescent 6500K | 1000                  | 312.5                                   | 139.0                                | 0.99                | 77           | 33.9         | <i>Adv. Funct. Mater.</i> , 2019, <b>29</b> , 1905163 |
| $\text{MAPb}(\text{I}_{0.9}\text{Br}_{0.1})_3$                                                    | LED 3000K         | 1000                  | 280                                     | 170.8                                | 0.821               | 68.8         | 34.5         | <i>Nano Energy</i> , 2020, <b>75</b> , 104984.        |
| $(\text{FA}_{0.6}\text{MA}_{0.4})_{0.9}\text{Cs}_{0.1}\text{Pb}(\text{I}_{0.6}\text{Br}_{0.4})_3$ | LED 3000K         | 1000                  | 279.6                                   | 111.0                                | 1.08                | 83           | 35.6         | <i>Nano Energy</i> , 2020, <b>78</b> , 105377.        |
| $(\text{FAPbI}_3)_{0.92}(\text{MAPbBr}_3)_{0.08}$                                                 | LED 2700 K        | 824.5                 | 301.6                                   | 152.10                               | 1.001               | 79.52        | 40.1         | <i>Adv. Mater.</i> , 2021, <b>33</b> , 2100770.       |
| $\text{CsPbI}_3$                                                                                  | LED 2700 K        | 1000                  | 365                                     | 177                                  | 0.988               | 77.8         | 37.24        | <i>Adv. Mater.</i> , 2022, <b>34</b> , 2106750.       |
| $\text{Cs}_{0.05}(\text{FA}_x\text{MA}_{1-x})_{0.95}\text{Pb}(\text{I}_y\text{Br}_{1-y})_3$       | <b>LED 2700 K</b> | <b>1000</b>           | <b>307.3</b>                            | <b>152.79</b>                        | <b>1.028</b>        | <b>75.37</b> | <b>38.52</b> | <b>This work</b>                                      |
